# Supplementary material
Source: PubMed Central journal article supplement (PMC3868013)
Supplement: NIHMS532015-supplement-02.pdf [file NIHMS532015-supplement-02.pdf]

**Supplementary Table e1.** Echocardiographic M-mode analysis parameters. First lines: data obtained at 3 months after local heart irradiation; Second lines (shaded): data obtained at 6 months.

|                            | Vehicle<br>0 Gy            | Vehicle<br>21 Gy          | Capsaicin<br>0 Gy         | Capsaicin<br>21 Gy        |
|----------------------------|----------------------------|---------------------------|---------------------------|---------------------------|
| LVAW in diastole (mm)      | 2.1 ± 0.1 <sup>a</sup>     | 1.9 ± 0.1 <sup>b</sup>    | 2.0 ± 0.1                 | 2.0 ± 0.04                |
|                            | 2.2 ± 0.1 <sup>a</sup>     | 1.7 ± 0.1 <sup>b</sup>    | 2.1 ± 0.1 <sup>a</sup>    | 1.8 ± 0.04 <sup>b</sup>   |
| LVAW in systole (mm)       | 3.2 ± 0.1                  | 3.0 ± 0.1                 | 3.1 ± 0.1                 | 3.1 ± 0.1                 |
|                            | 3.3 ± 0.1 <sup>a</sup>     | 2.8 ± 0.1 <sup>b</sup>    | 3.2 ± 0.1 <sup>a</sup>    | 2.8 ± 0.1 <sup>b</sup>    |
| LVPW in diastole (mm)      | 2.1 ± 0.05                 | 2.0 ± 0.04                | 2.1 ± 0.1                 | 2.0 ± 0.03                |
|                            | 2.2 ± 0.05 <sup>a</sup>    | 1.9 ± 0.1 <sup>b</sup>    | 2.2 ± 0.1 <sup>a</sup>    | 1.9 ± 0.1 <sup>b</sup>    |
| LVPW in systole (mm)       | 3.0 ± 0.1 <sup>a</sup>     | 2.8 ± 0.1 <sup>b</sup>    | 3.0 ± 0.1 <sup>a</sup>    | 2.8 ± 0.1 <sup>b</sup>    |
|                            | 3.1 ± 0.1                  | 2.9 ± 0.1                 | 3.1 ± 0.1                 | 2.9 ± 0.1                 |
| LV mass (mg)               | 1066.6 ± 36.3 <sup>a</sup> | 924.4 ± 33.3 <sup>b</sup> | 995.5 ± 39.2              | 1015.6 ± 22.2             |
|                            | 1157.4 ± 34.0 <sup>a</sup> | 955.6 ± 38.0 <sup>b</sup> | 1073.2 ± 27.7             | 992.4 ± 35.0              |
| LVID in diastole (mm)      | 7.9 ± 0.2                  | 7.7 ± 0.1                 | 7.7 ± 0.1                 | 8.0 ± 0.1                 |
|                            | 8.0 ± 0.1                  | 8.3 ± 0.2                 | 7.7 ± 0.2 <sup>a</sup>    | 8.4 ± 0.2 <sup>b</sup>    |
| LVID in systole (mm)       | 4.7 ± 0.2                  | 4.6 ± 0.1                 | 4.5 ± 0.1                 | 4.9 ± 0.2                 |
|                            | 4.9 ± 0.2                  | 5.1 ± 0.1                 | 4.7 ± 0.2 <sup>a</sup>    | 5.2 ± 0.2 <sup>b</sup>    |
| LV volume in diastole (μl) | 338.7 ± 16.7               | 317.6 ± 9.4               | 319.5 ± 12.9              | 342.3 ± 8.2               |
|                            | 347.2 ± 12.6               | 380.3 ± 17.2              | 321.5 ± 14.5 <sup>a</sup> | 386.6 ± 21.1 <sup>b</sup> |
| LV volume in systole (μl)  | 103.0 ± 9.7                | 100.2 ± 6.4               | 94.1 ± 6.9                | 118.1 ± 11.1              |
|                            | 116.2 ± 10.7               | 123.7 ± 7.6               | 102.0 ± 8.6 <sup>a</sup>  | 133.3 ± 13.3 <sup>b</sup> |
| EF (%)                     | 74.8 ± 1.6                 | 74.0 ± 1.5                | 75.2 ± 1.3                | 71.0 ± 2.5                |
|                            | 69.5 ± 1.8                 | 70.5 ± 1.1                | 72.8 ± 1.7                | 68.8 ± 2.1                |
| FS (%)                     | 45.5 ± 1.5                 | 44.6 ± 1.4                | 45.8 ± 1.2                | 42.4 ± 1.9                |
|                            | 40.8 ± 1.5                 | 41.7 ± 0.9                | 43.6 ± 1.5                | 40.4 ± 1.6                |
| Stroke volume (μl)         | 251.8 ± 10.9               | 238.7 ± 7.5               | 240.4 ± 8.8               | 246.9 ± 8.8               |
|                            | 233.1 ± 6.2 <sup>a</sup>   | 268.2 ± 12.1 <sup>b</sup> | 229.5 ± 8.5 <sup>a</sup>  | 273.2 ± 16.7 <sup>b</sup> |
| Cardiac output (ml/min)    | 86.5 ± 6.0                 | 78.2 ± 3.1                | 84.5 ± 2.1                | 80.0 ± 3.2                |
|                            | 82.9 ± 3.8                 | 73.7 ± 2.3                | 81.6 ± 2.7 <sup>a</sup>   | 65.2 ± 5.1 <sup>b</sup>   |
| Aortic outflow tract (mm)  | 3.25 ± 0.08                | 3.27 ± 0.14               | 3.13 ± 0.14               | 3.16 ± 0.12               |
|                            | 3.49 ± 0.05                | 3.28 ± 0.06               | 3.43 ± 0.11 <sup>a</sup>  | 3.16 ± 0.11 <sup>b</sup>  |

Average ± SEM, n=11-12. Different characters indicate statistically significant differences (p<0.05).
